# Supplementary material for: Transcriptome Profile Reveals Differences between Remote and Ischemic Myocardium after Acute Myocardial Infarction in a Swine Model
Source: Biology (Basel). 2023 Feb 21;12(3):340. doi: 10.3390/biology12030340 (PMC10045039; doi:10.3390/biology12030340)
Supplement: Supplementary file 1 [file biology-12-00340-s001.zip › Supplementary Table S1.xlsx]

## Sheet: Hoja1
	Supplementary Table S1: Gene Symbols of Up- and Down-reglated genes validated by proteomic.
		Transcriptomic		Proteomic				Transcriptomic		Proteomic
	Up-regulated Genes	Fold Change	FDR P-val	Zq	FDRq		Down-regulated Genes	Fold Change	FDR P-val	Zq	FDRq
	S100A11	2.97	0.0051	5.15052	5.09317e-05		ENO3	-8.51	0.0147	-3.30409	0.0363935
	HTRA1	5.89	0.0077	3.67751	0.0119427		GPD1	-2.65	0.0082	-2.9873	0.0759395
	ANXA1	2.98	0.0172	3.51826	0.0193563		ACTN2	-5.92	0.0231	-2.96198	0.0795555
	GUSB	4.67	0.0017	3.41937	0.0256386		TCAP	-11.8	0.0032	-2.9052	0.0907071
	BGN	8.48	0.0034	3.29742	0.0367913		CKMT2	-11.29	0.0017	-2.62921	0.152548
	FTL	3	0.0057	3.14479	0.0520005		MYBPC3	-13.49	0.0176	-2.60475	0.160002
	FKBP11	3.31	0.023	2.84456	0.104636		ART3	-8.73	0.0025	-2.52503	0.180022
	FN1	21.89	0.0114	2.67794	0.139654		COX5B	-5.51	0.0044	-2.42624	0.21366
	SPP1	178.76	0.0044	2.66347	0.143961		NDUFV2	-4.95	0.0127	-2.32508	0.247976
	CAPG	8.05	0.0017	2.65383	0.145375		MYOT	-4.12	0.0404	-2.31164	0.251707
	VIM	3.39	0.0014	2.50734	0.183461		IDH3A	-3.71	0.014	-2.25763	0.271122
	FMOD	12.62	0.0008	2.51251	0.18362		CHCHD10	-5.15	0.0087	-2.24384	0.272619
	LGALS3	6.59	0.0097	2.45388	0.204745		CS	-2.76	0.0158	-2.15623	0.303535
	CTSH	9.96	0.0044	2.41205	0.216992		CASQ2	-4.46	0.0128	-2.11774	0.322349
	COL6A3	2.97	0.0052	2.3095	0.251075		SORBS2	-3.44	0.0389	-2.1066	0.323071
	TAGLN	3.1	0.0091	2.21312	0.285491		TPM1	-3.03	0.0058	-2.11105	0.323585
	POSTN	10.96	0.0123	2.19988	0.289064		ETFB	-5.87	0.0233	-2.07923	0.335059
	LCP1	6.08	0.0052	2.19321	0.291956		IDH2	-3.63	0.0024	-2.03196	0.359381
	NDRG1	2.37	0.0159	2.11756	0.321468		GOT1	-6.85	0.0008	-2.00429	0.373126
	ANXA5	2.32	0.0126	2.0835	0.33462		PDHB	-4.58	0.0385	-1.98457	0.380253
	FKBP10	3.24	0.0034	2.08531	0.335198		PRDX3	-3.49	0.03	-1.92935	0.409056
	ARPC5	3.81	0.0044	1.99444	0.375597		SOD2	-5.65	0.0013	-1.91736	0.41198
	STAB1	2.21	0.0067	1.94204	0.402416		FLNC	-3.63	0.0141	-1.89385	0.419846
	IFI30	7.47	0.0238	1.92144	0.411261		GPT	-3.73	0.0017	-1.89959	0.42057
	ALDH2	3.21	0.027	1.91767	0.412731		ACO2	-5.54	0.0014	-1.88316	0.422931
	S100A8	5.31	0.0177	1.90379	0.419678		MYL3	-6.53	0.0146	-1.86303	0.428178
	PRUNE2	5.02	0.0472	1.89429	0.420463		PDPR	-3.63	0.0172	-1.84949	0.430367
	PTPRC	4.25	0.0104	1.84253	0.434161		NDUFB8	-7.02	0.0477	-1.82617	0.438403
	GNG2	2.9	0.0119	1.74191	0.467376		NDUFS2	-3.12	0.0218	-1.80717	0.441689
	COL1A2	6.81	0.0033	1.71509	0.478145		IDH3B	-4.92	0.003	-1.78975	0.444749
	NAGK	6.08	0.0021	1.68099	0.495136		PPIF	-4.25	0.0021	-1.76224	0.461731
	THBS1	4.45	0.0244	1.6721	0.500791		GOT2	-6.25	0.0079	-1.76122	0.461823
	ACTN1	5.35	0.003	1.64487	0.507925		ACSL1	-4.97	0.0004	-1.76345	0.462389
	MAN2B1	3.32	0.039	1.62307	0.510887		ADHFE1	-4.78	0.004	-1.76238	0.462523
	CALD1	3.5	0.0029	1.59868	0.520441		NDUFS8	-4.66	0.0483	-1.74789	0.465944
	PHGDH	3.44	0.0046	1.39972	0.580994		ATP2A2	-3.57	0.0014	-1.73242	0.470556
	LGALS1	2.61	0.0478	1.38798	0.58729		NDUFS6	-5.01	0.0046	-1.72682	0.472585
	TNC	6.46	0.0035	1.37866	0.588195		SMYD1	-5.19	0.0326	-1.72581	0.472703
	CNN3	2.28	0.039	1.36631	0.592486		ADGRF5	-2.22	0.0167	-1.72705	0.473249
	PLOD2	3.14	0.0124	1.3461	0.595788		RYR2	-6.3	0.0102	-1.71835	0.477539
	APOE	2.8	0.0158	1.32755	0.605024		GLRX5	-5.38	0.0496	-1.70727	0.480707
	COL3A1	4.6	0.0325	1.31689	0.609196		SLC25A4	-8.26	0.0199	-1.68339	0.494452
	PLTP	2.42	0.0052	1.28347	0.613206		RBFOX1	-5.25	0.0018	-1.64688	0.510234
	TPM4	5.48	0.0162	1.25665	0.61802		HSDL2	-2.87	0.0163	-1.62205	0.511098
	BIN2	3.6	0.0108	1.24503	0.62243		APOBEC2	-8.55	0.0065	-1.63923	0.511213
	MLKL	3.55	0.0092	1.23913	0.625685		HSD17B10	-3.35	0.0216	-1.62891	0.511619
	CALR	2.78	0.0404	1.10217	0.682586		NDUFA10	-6	0.0031	-1.61036	0.514051
	SH3PXD2B	2.47	0.0333	1.10567	0.683445		IVD	-5.68	0.0003	-1.59456	0.518944
	SPARC	3.37	0.0266	1.04982	0.701929		PYGM	-7.52	0.0129	-1.59487	0.519447
	FES	2.53	0.0133	1.01629	0.708894		DHRS11	-5	0.0088	-1.5977	0.519799
	SND1	2.68	0.0133	0.904238	0.757761		IDH3G	-2.98	0.0163	-1.56509	0.528672
	LYZ	24.07	0.0135	0.854486	0.771248		HADHA	-4.55	0.0038	-1.55198	0.528884
	GNAI2	2.49	0.0177	0.737998	0.810034		SUCLG1	-3.21	0.0147	-1.55115	0.528966
	CTSS	8.01	0.0025	0.732114	0.810519		LOC100522678	-6.02	0.0222	-1.53936	0.533501
	FNDC1	2.35	0.0357	0.723059	0.812962		MLIP	-4.65	0.0014	-1.50704	0.544416
	SDC2	6.36	0.0396	0.663863	0.831715		CHCHD3	-4.09	0.0305	-1.48412	0.5528
	CD109	2.12	0.0192	0.661413	0.83197		ABLIM1	-7.85	0.0079	-1.48207	0.553479
	MYL6	2.42	0.0263	0.591142	0.858644		HINT2	-5.05	0.0369	-1.47579	0.554164
	CDC42	2.65	0.0088	0.571578	0.86137		NDUFA3	-3.79	0.0026	-1.45234	0.563596
	PABPC1	2.6	0.0093	0.560265	0.864124		ACADM	-3.69	0.0355	-1.44337	0.566577
	AEBP1	4.28	0.0012	0.521841	0.875291		TUBA8	-6.77	0.0059	-1.44072	0.567223
	COL14A1	2.54	0.022	0.509465	0.880895		CAMK2D	-2.73	0.0072	-1.43554	0.569118
	SRSF11	2.71	0.0155	0.374772	0.91787		MYOM1	-7.44	0.0016	-1.42936	0.569943
	PLD4	2.29	0.0198	0.324426	0.932733		LDB3	-10.5	0.0003	-1.41942	0.57196
	EPB41L2	2.67	0.0056	0.281291	0.949225		NEBL	-4.09	0.0148	-1.4203	0.572447
	CHD3	3.5	0.0017	0.13851	0.973228		HADH	-3.92	0.0086	-1.41172	0.574499
	SFRP2	6.74	0.0114	0.125599	0.97497		AK1	-9.63	0.0052	-1.40388	0.580078
	TIMP1	2.49	0.039	0.10716	0.977124		PGAM2	-13.02	0.0034	-1.40271	0.580628
	ACTB	3	0.0163	0.0523991	0.988806		TUFM	-3.07	0.0136	-1.39369	0.583952
	PLEKHO2	2.39	0.03	0.0176534	0.993686		SLC25A3	-2.67	0.0432	-1.38584	0.588893
							PTPMT1	-5.48	0.0172	-1.38216	0.589337
							ACADSB	-6.28	0.0105	-1.38222	0.589987
							PDLIM5	-2.32	0.0047	-1.36347	0.592093
							MACROD1	-10.6	0.0009	-1.36217	0.592109
							GSTK1	-7.3	0.0104	-1.35179	0.595086
							ACOT13	-9.38	0.0092	-1.3539	0.595549
							PDHX	-2.42	0.0238	-1.33253	0.601662
							ACAA2	-4.85	0.0165	-1.32997	0.603757
							CRYAB	-4.18	0.033	-1.30243	0.611581
							SORBS1	-7.49	0.0092	-1.29781	0.61198
							ATP5B	-3.4	0.0357	-1.28354	0.613768
							TMEM65	-7.64	0.0196	-1.29253	0.615082
							SRL	-4.76	0.0194	-1.2335	0.629891
							NDUFB9	-4.94	0.008	-1.22019	0.636247
							AIFM1	-5.65	0.0466	-1.21132	0.640302
							NDUFA9	-5.14	0.0021	-1.19873	0.644147
							GAPDH	-3.14	0.0361	-1.18219	0.652996
							HSPB2	-4.56	0.0177	-1.17552	0.655398
							VDAC1	-2.28	0.022	-1.16251	0.658712
							ATP1B1	-4.22	0.0034	-1.15756	0.660504
							NDUFB6	-5.84	0.0417	-1.15671	0.660833
							LOC100524873	-3.45	0.0363	-1.15244	0.661901
							SLC25A11	-4.8	0.0191	-1.14817	0.662379
							TIMM44	-2.27	0.0325	-1.13321	0.670393
							DHRS7C	-18.6	0.0009	-1.13236	0.670731
							ETFDH	-3.89	0.0096	-1.09697	0.68303
							ANK3	-8.24	0.0014	-1.07449	0.689168
							DNAJA4	-2.16	0.024	-1.06893	0.692959
							PDLIM1	-2.7	0.024	-1.06425	0.695799
							DSP	-6.48	0.0041	-1.05585	0.699298
							ECSIT	-6.04	0.0232	-1.04366	0.702442
							APOO	-6.34	0.0122	-1.04034	0.70325
							NNT	-3.41	0.0023	-1.03584	0.704805
							XIRP1	-4.71	0.0289	-1.02422	0.706332
							SPTB	-2.59	0.0114	-1.02007	0.708642
							MYL7	-45.55	0.02	-1.00474	0.712682
							PGM1	-2.97	0.0051	-1.00581	0.713154
							UNC45B	-13.95	0.0282	-0.998408	0.714651
							NDUFA13	-8.62	0.0037	-0.957833	0.73557
							CRAT	-3.34	0.0212	-0.951524	0.737602
							SNTA1	-3.11	0.0047	-0.940919	0.740582
							DHRS4	-7.44	0.0087	-0.939252	0.740794
							OXCT1	-4.67	0.0171	-0.903582	0.757416
							CD36	-3.04	0.0167	-0.870352	0.767433
							CYB5R1	-5.75	0.0035	-0.881533	0.768338
							PKP2	-2.71	0.0157	-0.879393	0.769099
							NDUFV1	-4.55	0.0085	-0.854967	0.77124
							EPB41L3	-2.62	0.0214	-0.823846	0.782537
							MTUS2	-3.13	0.0106	-0.805256	0.789532
							ISOC2	-4.48	0.0086	-0.796319	0.79317
							ABLIM2	-2.9	0.03	-0.793338	0.794388
							NDUFB7	-5.3	0.004	-0.789058	0.79601
							ACSS1	-2.53	0.0177	-0.76993	0.802216
							TLN2	-2.24	0.0082	-0.735237	0.809116
							YBX3	-2.22	0.0344	-0.755954	0.809859
							ACSS2	-2.38	0.0213	-0.756082	0.810217
							CDH13	-4.04	0.0063	-0.740106	0.810691
							PGM5	-4.81	0.016	-0.744827	0.810998
							CLIC5	-4.78	0.0056	-0.713219	0.815306
							NT5C1A	-5.27	0.0011	-0.702453	0.819601
							AK3	-2.3	0.0254	-0.699082	0.820805
							ASNA1	-2.84	0.0127	-0.693106	0.821466
							EPHX2	-2.39	0.0088	-0.680054	0.827263
							CMYA5	-4.42	0.0084	-0.650256	0.833974
							HRC	-8.14	0.0014	-0.596788	0.858218
							EPHX1	-6	0.002	-0.587181	0.858689
							ADCY6	-7.58	0.0018	-0.585887	0.859578
							NDUFA12	-4.36	0.0037	-0.580816	0.859882
							NDUFS3	-4.62	0.0063	-0.554748	0.867127
							ACSS3	-9.45	0.0036	-0.543168	0.867542
							PLIN4	-4.47	0.0022	-0.543777	0.868231
							STARD7	-3.07	0.004	-0.544379	0.869368
							FGF1	-2.84	0.0028	-0.522118	0.875876
							CAST	-2.62	0.0044	-0.488145	0.887333
							NCEH1	-3.78	0.0063	-0.482157	0.89078
							PTPN21	-2.5	0.0387	-0.478297	0.89166
							HSD17B8	-3.32	0.0346	-0.472265	0.893864
							LAMB2	-2.36	0.0208	-0.452816	0.898851
							APOOL	-3.27	0.0424	-0.463844	0.898885
							HHATL	-10.7	0.0012	-0.413441	0.905198
							NRAP	-8.78	0.0079	-0.409721	0.907188
							SLC16A1	-3.62	0.0058	-0.370639	0.919023
							HSPB3	-5.42	0.0346	-0.321759	0.934068
							FXR2	-3.13	0.0158	-0.254898	0.953053
							ATP1A1	-2.25	0.0213	-0.190598	0.963505
							HSPB6	-3.64	0.042	-0.186172	0.964836
							CAP2	-4.01	0.0148	-0.1653	0.967021
							PALMD	-2.65	0.0168	-0.165953	0.969016
							ACACB	-8.99	0.0014	-0.152882	0.969108
							CTNNA1	-4.6	0.049	-0.13665	0.973027
							SGCA	-3.79	0.0028	-0.132575	0.973654
							MRPL49	-3.01	0.0341	-0.0792237	0.982628
							BCKDK	-2.74	0.0158	-0.0356074	0.993554

## Sheet: Hoja3
Fold Change	FDR P-val	Gene symbol
-8.51	0.0147	ENO3
-2.65	0.0082	GPD1
-5.92	0.0231	ACTN2
-11.8	0.0032	TCAP
-11.29	0.0017	CKMT2
-13.49	0.0176	MYBPC3
-8.73	0.0025	ART3
-5.51	0.0044	COX5B
-4.95	0.0127	NDUFV2
-4.12	0.0404	MYOT
-3.71	0.014	IDH3A
-5.15	0.0087	CHCHD10
-2.76	0.0158	CS
-4.46	0.0128	CASQ2
-3.44	0.0389	SORBS2
-3.03	0.0058	TPM1
-5.87	0.0233	ETFB
-3.63	0.0024	IDH2
-6.85	0.0008	GOT1
-4.58	0.0385	PDHB
-3.49	0.03	PRDX3
-5.65	0.0013	SOD2
-3.63	0.0141	FLNC
-3.73	0.0017	GPT
-5.54	0.0014	ACO2
-6.53	0.0146	MYL3
-3.63	0.0172	PDPR
-7.02	0.0477	NDUFB8
-3.12	0.0218	NDUFS2
-4.92	0.003	IDH3B
-4.25	0.0021	PPIF
-6.25	0.0079	GOT2
-4.97	0.0004	ACSL1
-4.78	0.004	ADHFE1
-4.66	0.0483	NDUFS8
-3.57	0.0014	ATP2A2
-5.01	0.0046	NDUFS6
-5.19	0.0326	SMYD1
-2.22	0.0167	ADGRF5
-6.3	0.0102	RYR2
-5.38	0.0496	GLRX5
-8.26	0.0199	SLC25A4
-5.25	0.0018	RBFOX1
-2.87	0.0163	HSDL2
-8.55	0.0065	APOBEC2
-3.35	0.0216	HSD17B10
-6	0.0031	NDUFA10
-5.68	0.0003	IVD
-7.52	0.0129	PYGM
-5	0.0088	DHRS11
-2.98	0.0163	IDH3G
-4.55	0.0038	HADHA
-3.21	0.0147	SUCLG1
-6.02	0.0222	LOC100522678
-4.65	0.0014	MLIP
-4.09	0.0305	CHCHD3
-7.85	0.0079	ABLIM1
-5.05	0.0369	HINT2
-3.79	0.0026	NDUFA3
-3.69	0.0355	ACADM
-6.77	0.0059	TUBA8
-2.73	0.0072	CAMK2D
-7.44	0.0016	MYOM1
-10.5	0.0003	LDB3
-4.09	0.0148	NEBL
-3.92	0.0086	HADH
-9.63	0.0052	AK1
-13.02	0.0034	PGAM2
-3.07	0.0136	TUFM
-2.67	0.0432	SLC25A3
-5.48	0.0172	PTPMT1
-6.28	0.0105	ACADSB
-2.32	0.0047	PDLIM5
-10.6	0.0009	MACROD1
-7.3	0.0104	GSTK1
-9.38	0.0092	ACOT13
-2.42	0.0238	PDHX
-4.85	0.0165	ACAA2
-4.18	0.033	CRYAB
-7.49	0.0092	SORBS1
-3.4	0.0357	ATP5B
-7.64	0.0196	TMEM65
-4.76	0.0194	SRL
-4.94	0.008	NDUFB9
-5.65	0.0466	AIFM1
-5.14	0.0021	NDUFA9
-3.14	0.0361	GAPDH
-4.56	0.0177	HSPB2
-2.28	0.022	VDAC1
-4.22	0.0034	ATP1B1
-5.84	0.0417	NDUFB6
-3.45	0.0363	LOC100524873
-4.8	0.0191	SLC25A11
-2.27	0.0325	TIMM44
-18.6	0.0009	DHRS7C
-3.89	0.0096	ETFDH
-8.24	0.0014	ANK3
-2.16	0.024	DNAJA4
-2.7	0.024	PDLIM1
-6.48	0.0041	DSP
-6.04	0.0232	ECSIT
-6.34	0.0122	APOO
-3.41	0.0023	NNT
-4.71	0.0289	XIRP1
-2.59	0.0114	SPTB
-45.55	0.02	MYL7
-2.97	0.0051	PGM1
-13.95	0.0282	UNC45B
-8.62	0.0037	NDUFA13
-3.34	0.0212	CRAT
-3.11	0.0047	SNTA1
-7.44	0.0087	DHRS4
-4.67	0.0171	OXCT1
-3.04	0.0167	CD36
-5.75	0.0035	CYB5R1
-2.71	0.0157	PKP2
-4.55	0.0085	NDUFV1
-2.62	0.0214	EPB41L3
-3.13	0.0106	MTUS2
-4.48	0.0086	ISOC2
-2.9	0.03	ABLIM2
-5.3	0.004	NDUFB7
-2.53	0.0177	ACSS1
-2.24	0.0082	TLN2
-2.22	0.0344	YBX3
-2.38	0.0213	ACSS2
-4.04	0.0063	CDH13
-4.81	0.016	PGM5
-4.78	0.0056	CLIC5
-5.27	0.0011	NT5C1A
-2.3	0.0254	AK3
-2.84	0.0127	ASNA1
-2.39	0.0088	EPHX2
-4.42	0.0084	CMYA5
-8.14	0.0014	HRC
-6	0.002	EPHX1
-7.58	0.0018	ADCY6
-4.36	0.0037	NDUFA12
-4.62	0.0063	NDUFS3
-9.45	0.0036	ACSS3
-4.47	0.0022	PLIN4
-3.07	0.004	STARD7
-2.84	0.0028	FGF1
-2.62	0.0044	CAST
-3.78	0.0063	NCEH1
-2.5	0.0387	PTPN21
-3.32	0.0346	HSD17B8
-2.36	0.0208	LAMB2
-3.27	0.0424	APOOL
-10.7	0.0012	HHATL
-8.78	0.0079	NRAP
-3.62	0.0058	SLC16A1
-5.42	0.0346	HSPB3
-3.13	0.0158	FXR2
-2.25	0.0213	ATP1A1
-3.64	0.042	HSPB6
-4.01	0.0148	CAP2
-2.65	0.0168	PALMD
-8.99	0.0014	ACACB
-4.6	0.049	CTNNA1
-3.79	0.0028	SGCA
-3.01	0.0341	MRPL49
-2.74	0.0158	BCKDK
7.19	0.0141	ACTA2
3	0.0163	ACTB
12.05	0.0295	ACTG2
5.35	0.003	ACTN1
4.28	0.0012	AEBP1
-3.1	0.0023	AGT
3.21	0.027	ALDH2
-18.01	0.0172	ANK1
2.98	0.0172	ANXA1
2.32	0.0126	ANXA5
2.8	0.0158	APOE
3.81	0.0044	ARPC5
2.82	0.0267	ATL3
8.48	0.0034	BGN
3.6	0.0108	BIN2
3.5	0.0029	CALD1
2.78	0.0404	CALR
8.05	0.0017	CAPG
-2.78	0.0145	CAT
2.12	0.0192	CD109
2.65	0.0088	CDC42
3.5	0.0017	CHD3
-3.59	0.0079	CLPP
-2.58	0.022	CLUH
2.28	0.039	CNN3
2.54	0.022	COL14A1
6.81	0.0033	COL1A2
4.6	0.0325	COL3A1
2.97	0.0052	COL6A3
-2.37	0.0163	CPNE3
9.96	0.0044	CTSH
8.01	0.0025	CTSS
-3.01	0.0466	CUTA
2.72	0.0166	DOCK11
2.67	0.0056	EPB41L2
-4.34	0.003	FBLN5
2.53	0.0133	FES
3.24	0.0034	FKBP10
3.31	0.023	FKBP11
12.62	0.0008	FMOD
21.89	0.0114	FN1
2.35	0.0357	FNDC1
3	0.0057	FTL
2.49	0.0177	GNAI2
2.9	0.0119	GNG2
4.67	0.0017	GUSB
5.89	0.0077	HTRA1
7.47	0.0238	IFI30
4.36	0.0029	ITGA4
-3.66	0.0212	KLHL41
6.08	0.0052	LCP1
2.61	0.0478	LGALS1
6.59	0.0097	LGALS3
-4.26	0.0172	LMOD2
24.07	0.0135	LYZ
3.32	0.039	MAN2B1
3.55	0.0092	MLKL
4.99	0.0253	MXRA5
2.42	0.0263	MYL6
5.66	0.0023	MYO1D
6.08	0.0021	NAGK
2.37	0.0159	NDRG1
-2.25	0.0337	NHLRC2
3.05	0.0063	OLFML3
2.6	0.0093	PABPC1
3.44	0.0046	PHGDH
2.76	0.0113	PICALM
2.29	0.0198	PLD4
2.39	0.03	PLEKHO2
-9.55	0.0177	PLN
3.14	0.0124	PLOD2
2.42	0.0052	PLTP
10.96	0.0123	POSTN
-7.28	0.0142	PRKAA2
5.02	0.0472	PRUNE2
4.25	0.0104	PTPRC
-2.59	0.0098	RHOT1
4.03	0.0022	ROR2
2.97	0.0051	S100A11
5.31	0.0177	S100A8
6.36	0.0396	SDC2
-2.21	0.044	SEC31A
10.25	0.0013	SELENBP1
6.74	0.0114	SFRP2
2.47	0.0333	SH3PXD2B
-2.86	0.0038	SLC25A34
2.68	0.0133	SND1
3.37	0.0266	SPARC
178.76	0.0044	SPP1
2.71	0.0155	SRSF11
2.21	0.0067	STAB1
-2.19	0.0466	SVIL
3.1	0.0091	TAGLN
-2.91	0.0141	TFRC
4.45	0.0244	THBS1
2.49	0.039	TIMP1
-2.01	0.0395	TINAGL1
6.46	0.0035	TNC
5.48	0.0162	TPM4
3.39	0.0014	VIM
